# Supplementary material for: Impact of electrolyte decomposition products on the electrochemical performance of 4 V class K-ion batteries
Source: Royal Society of Chemistry journal article supplement (doi:10.1039/d3sc02111d), 2023-01-01
Supplement: d3sc02111d1.pdf [file d3sc02111d1.pdf]

# **Impact of electrolyte decomposition products on electrochemical performance of 4 V class K-ion batteries**

Tomooki Hosaka, Tatsuo Matsuyama, Ryoichi Tatara,  
Zachary T. Gossage, Shinichi Komaba

Department of Applied Chemistry, Tokyo University of Science,  
Shinjuku, Tokyo 162-8601, Japan.

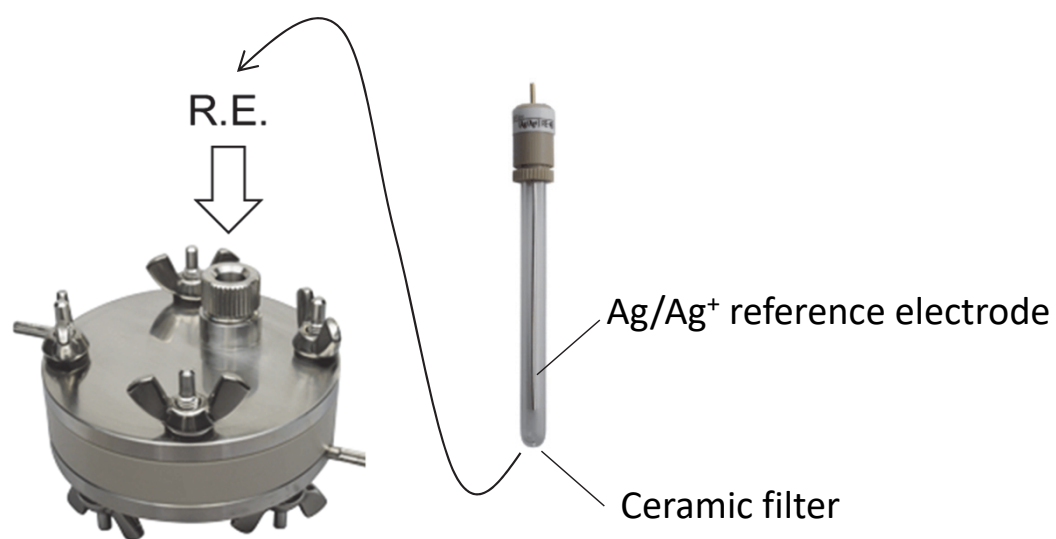

**Fig. S1** Photograph of the three-electrode cell.

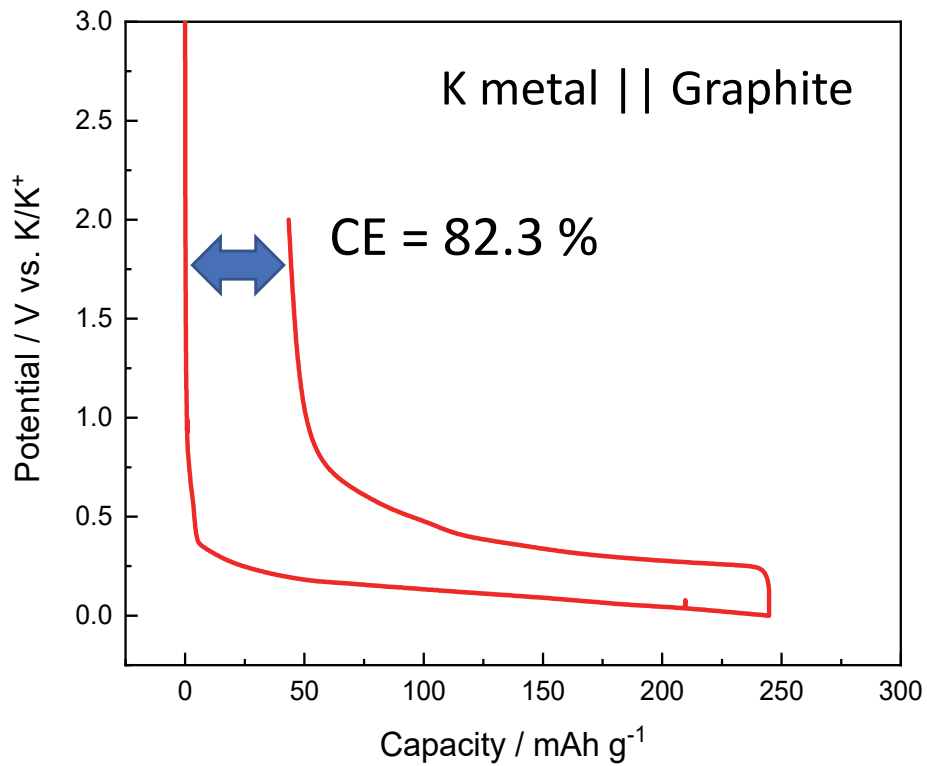

**Fig. S2** Initial charge/discharge curve of graphite in a three-electrode cell with K metal counter electrode and filled with 1 mol kg<sup>-1</sup> K(PF<sub>6</sub>)<sub>0.75</sub>(FSA)<sub>0.25</sub>/EC/DEC.

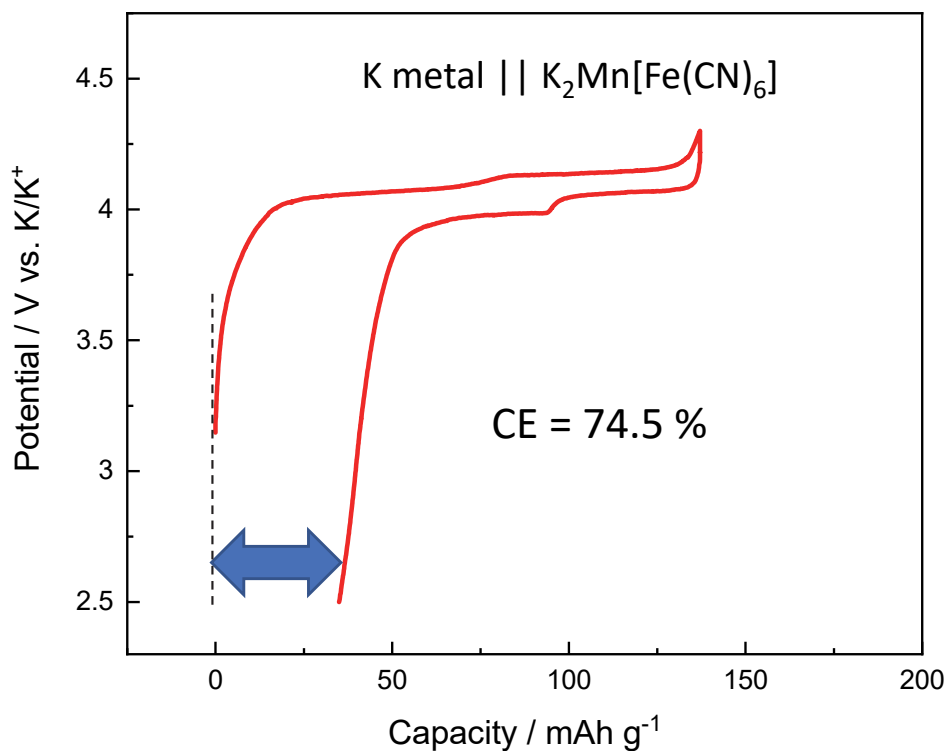

**Fig. S3** Initial charge/discharge curve of the  $\text{K}_2\text{Mn}[\text{Fe}(\text{CN})_6]$  electrodes in a three-electrode cell with a K metal counter electrode and filled with  $1 \text{ mol kg}^{-1} \text{K}(\text{PF}_6)_{0.75}(\text{FSA})_{0.25}/\text{EC}/\text{DEC}$ .

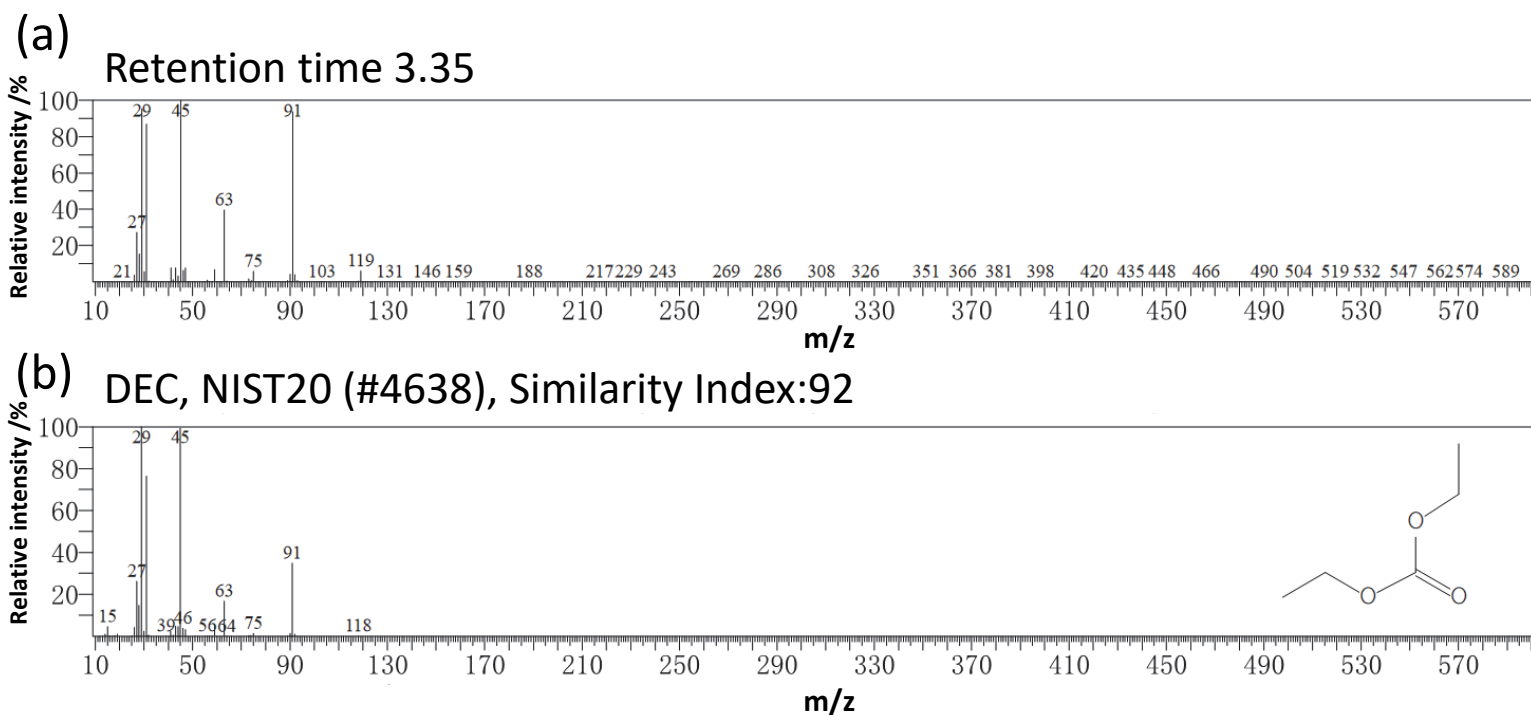

**Figure S4** (a) EI-MS spectra at a retention time 3.35 min. (b) Reference EI-MS spectra of DEC from National Institute of Standards and Technology (NIST) library.

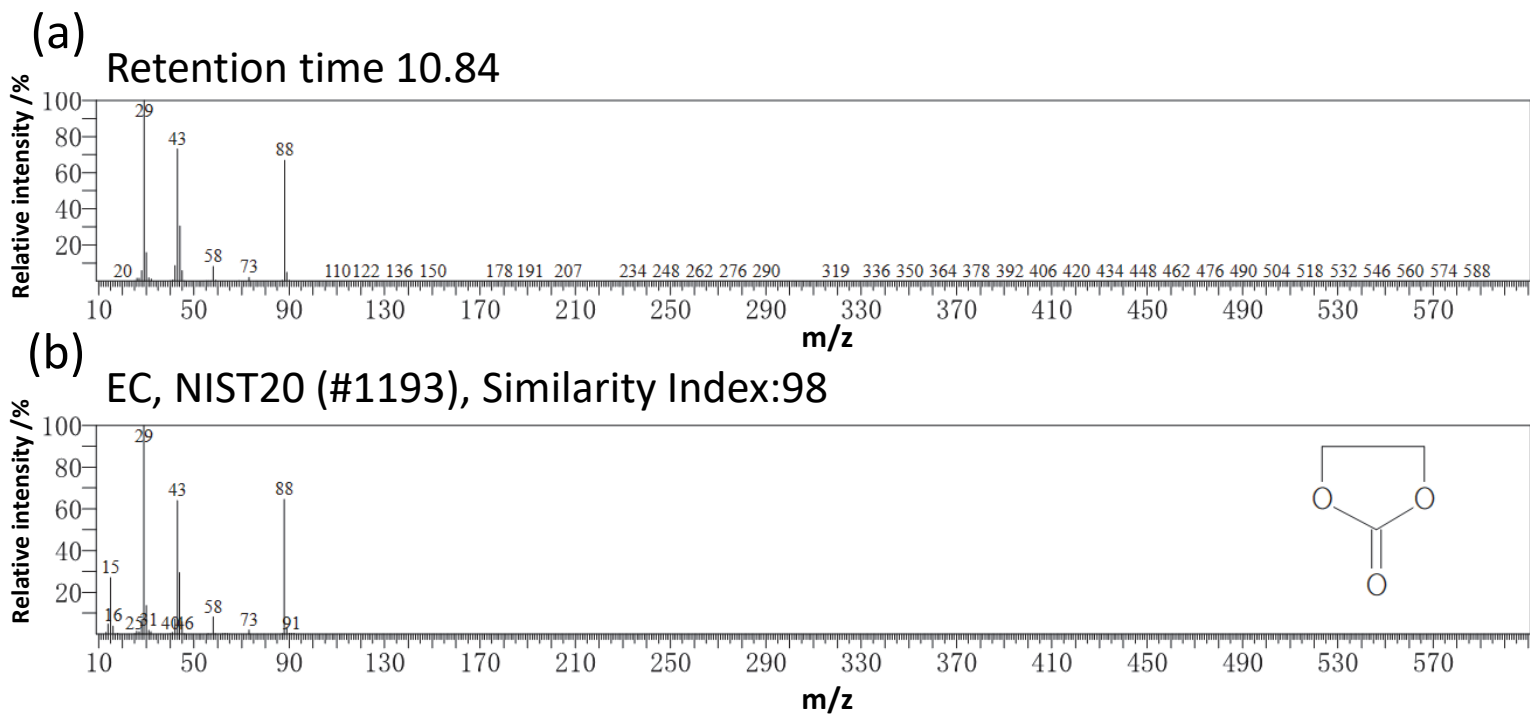

**Figure S5** (a) EI-MS spectra at a retention time 3.35 min. (b) Reference EI-MS spectra of DEC from NIST library.

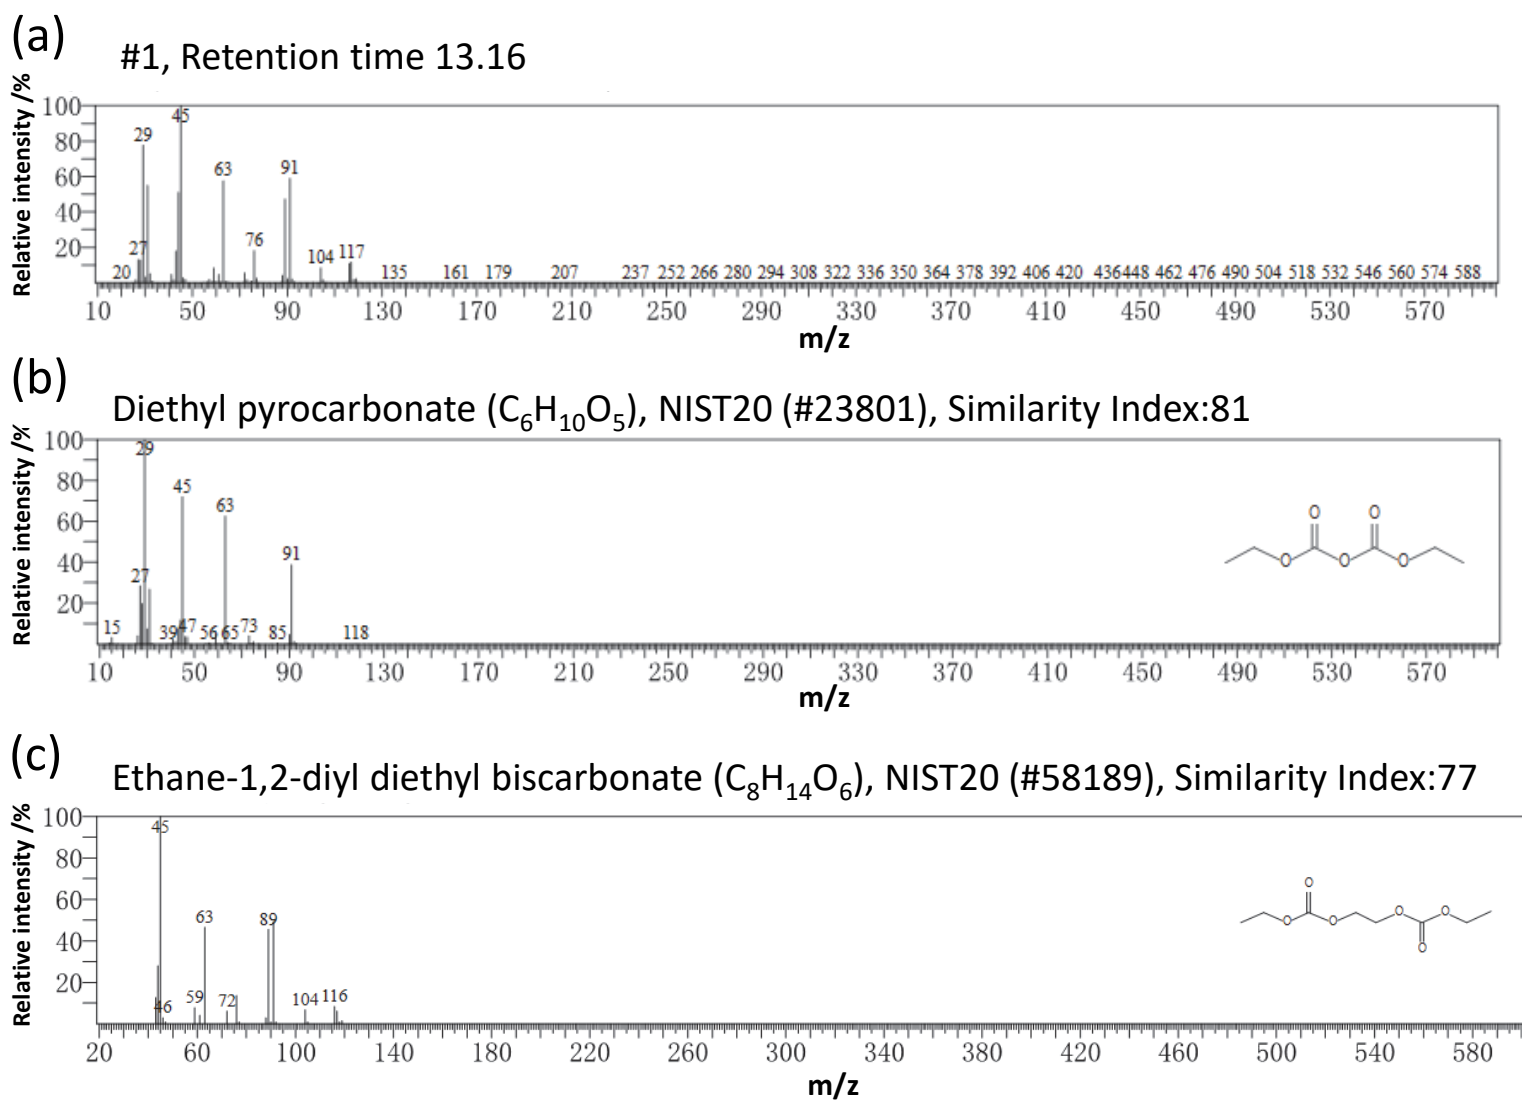

**Figure S6** (a) EI-MS spectra at a retention time 13.16 min. Reference EI-MS spectra of (b) diethyl pyrocarbonate and (c) ethane-1,2-diyl diethyl biscarbonate from NIST library.

(a) #2, Retention time 16.085

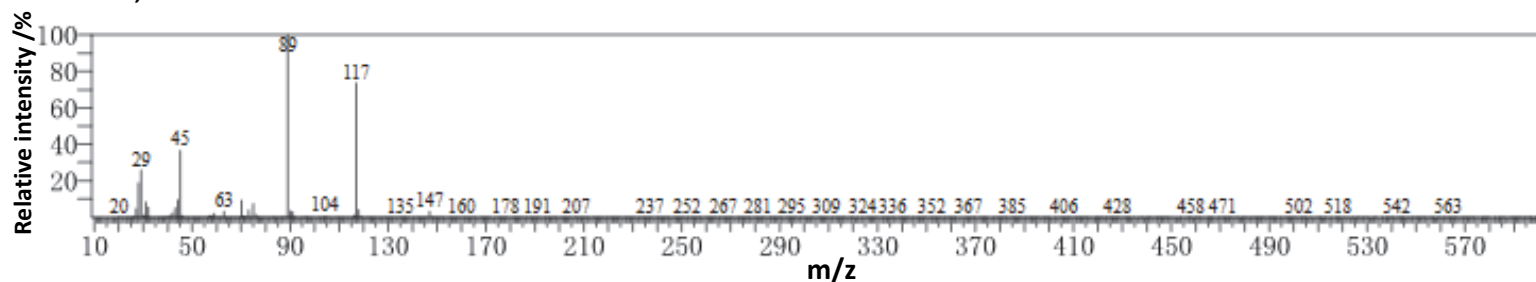

(b) Methyl pyruvate dimethyl acetal ( $C_6H_{12}O_4$ ), NIST20 (#15949), Similarity Index:74

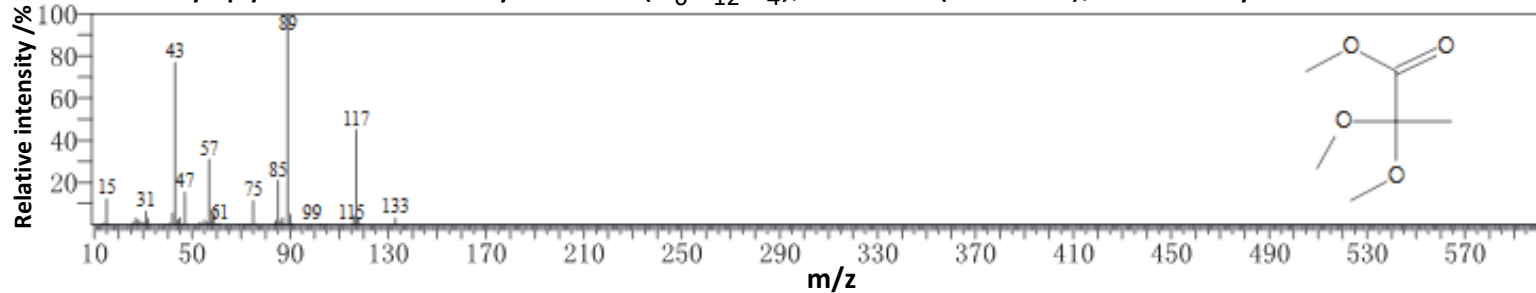

(c) Dimethyl 2,2'-(2,2'-oxybis(ethane-2,1-diyl)bis(oxy))diacetate ( $C_{10}H_{18}O_7$ )  
NIST20 (#104339), Similarity Index:74

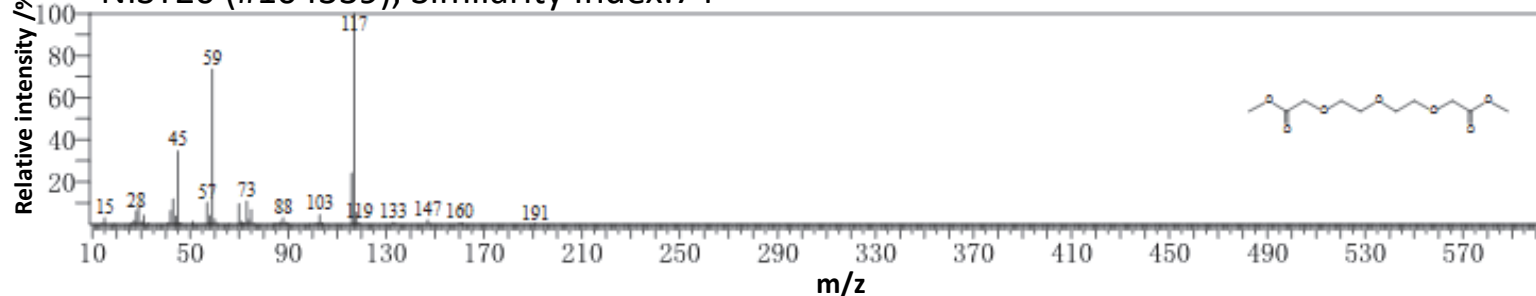

**Figure S7** (a) EI-MS spectra at a retention time 16.085 min. Reference EI-MS spectra of (b) methyl pyruvate dimethyl acetal and (c) dimethyl 2,2'-(2,2'-oxybis(ethane-2,1-diyl)bis(oxy))diacetate from NIST library.



(a) #3, Retention time 18.555

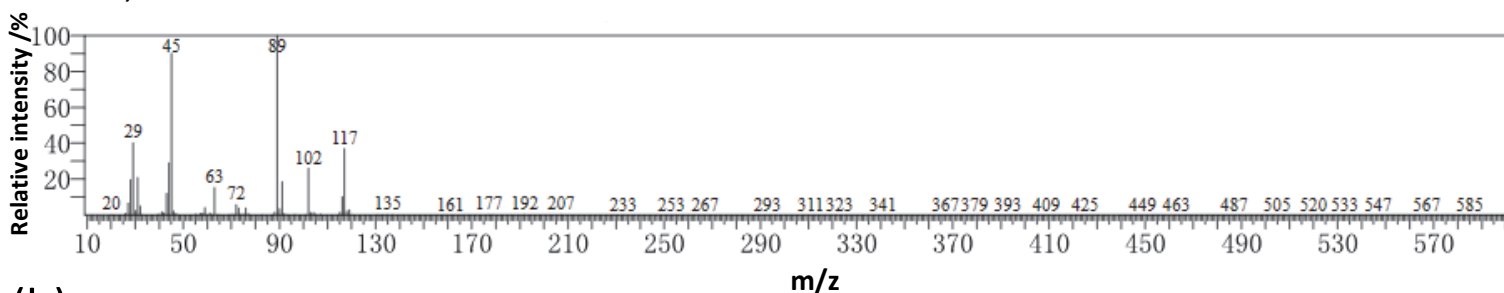

(b) 2-(2-Ethoxyethoxy)ethyl isobutyl carbonate ( $C_{11}H_{22}O_5$ ), NIST20 (#87174), Similarity Index:75

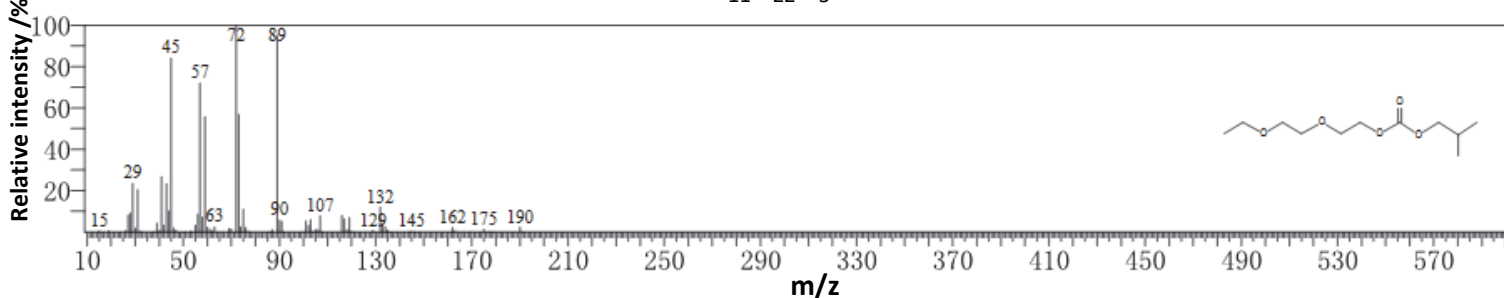

(c) Methoxytriethylene glycol ( $C_7H_{16}O_4$ ), NIST20 (#14408), Similarity Index:75

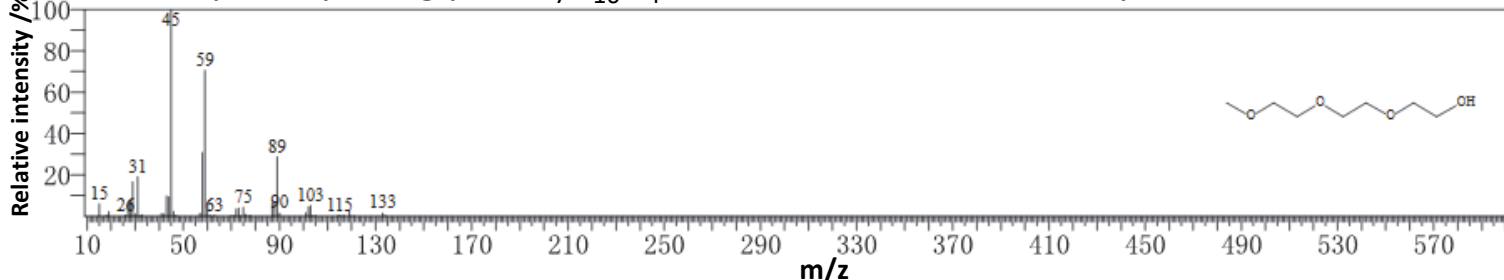

**Figure S8** (a) EI-MS spectra at a retention time 18.555 min. Reference EI-MS spectra of (b) 2-(2-Ethoxyethoxy)ethyl isobutyl carbonate and (c) methoxytriethylene glycol from NIST library.

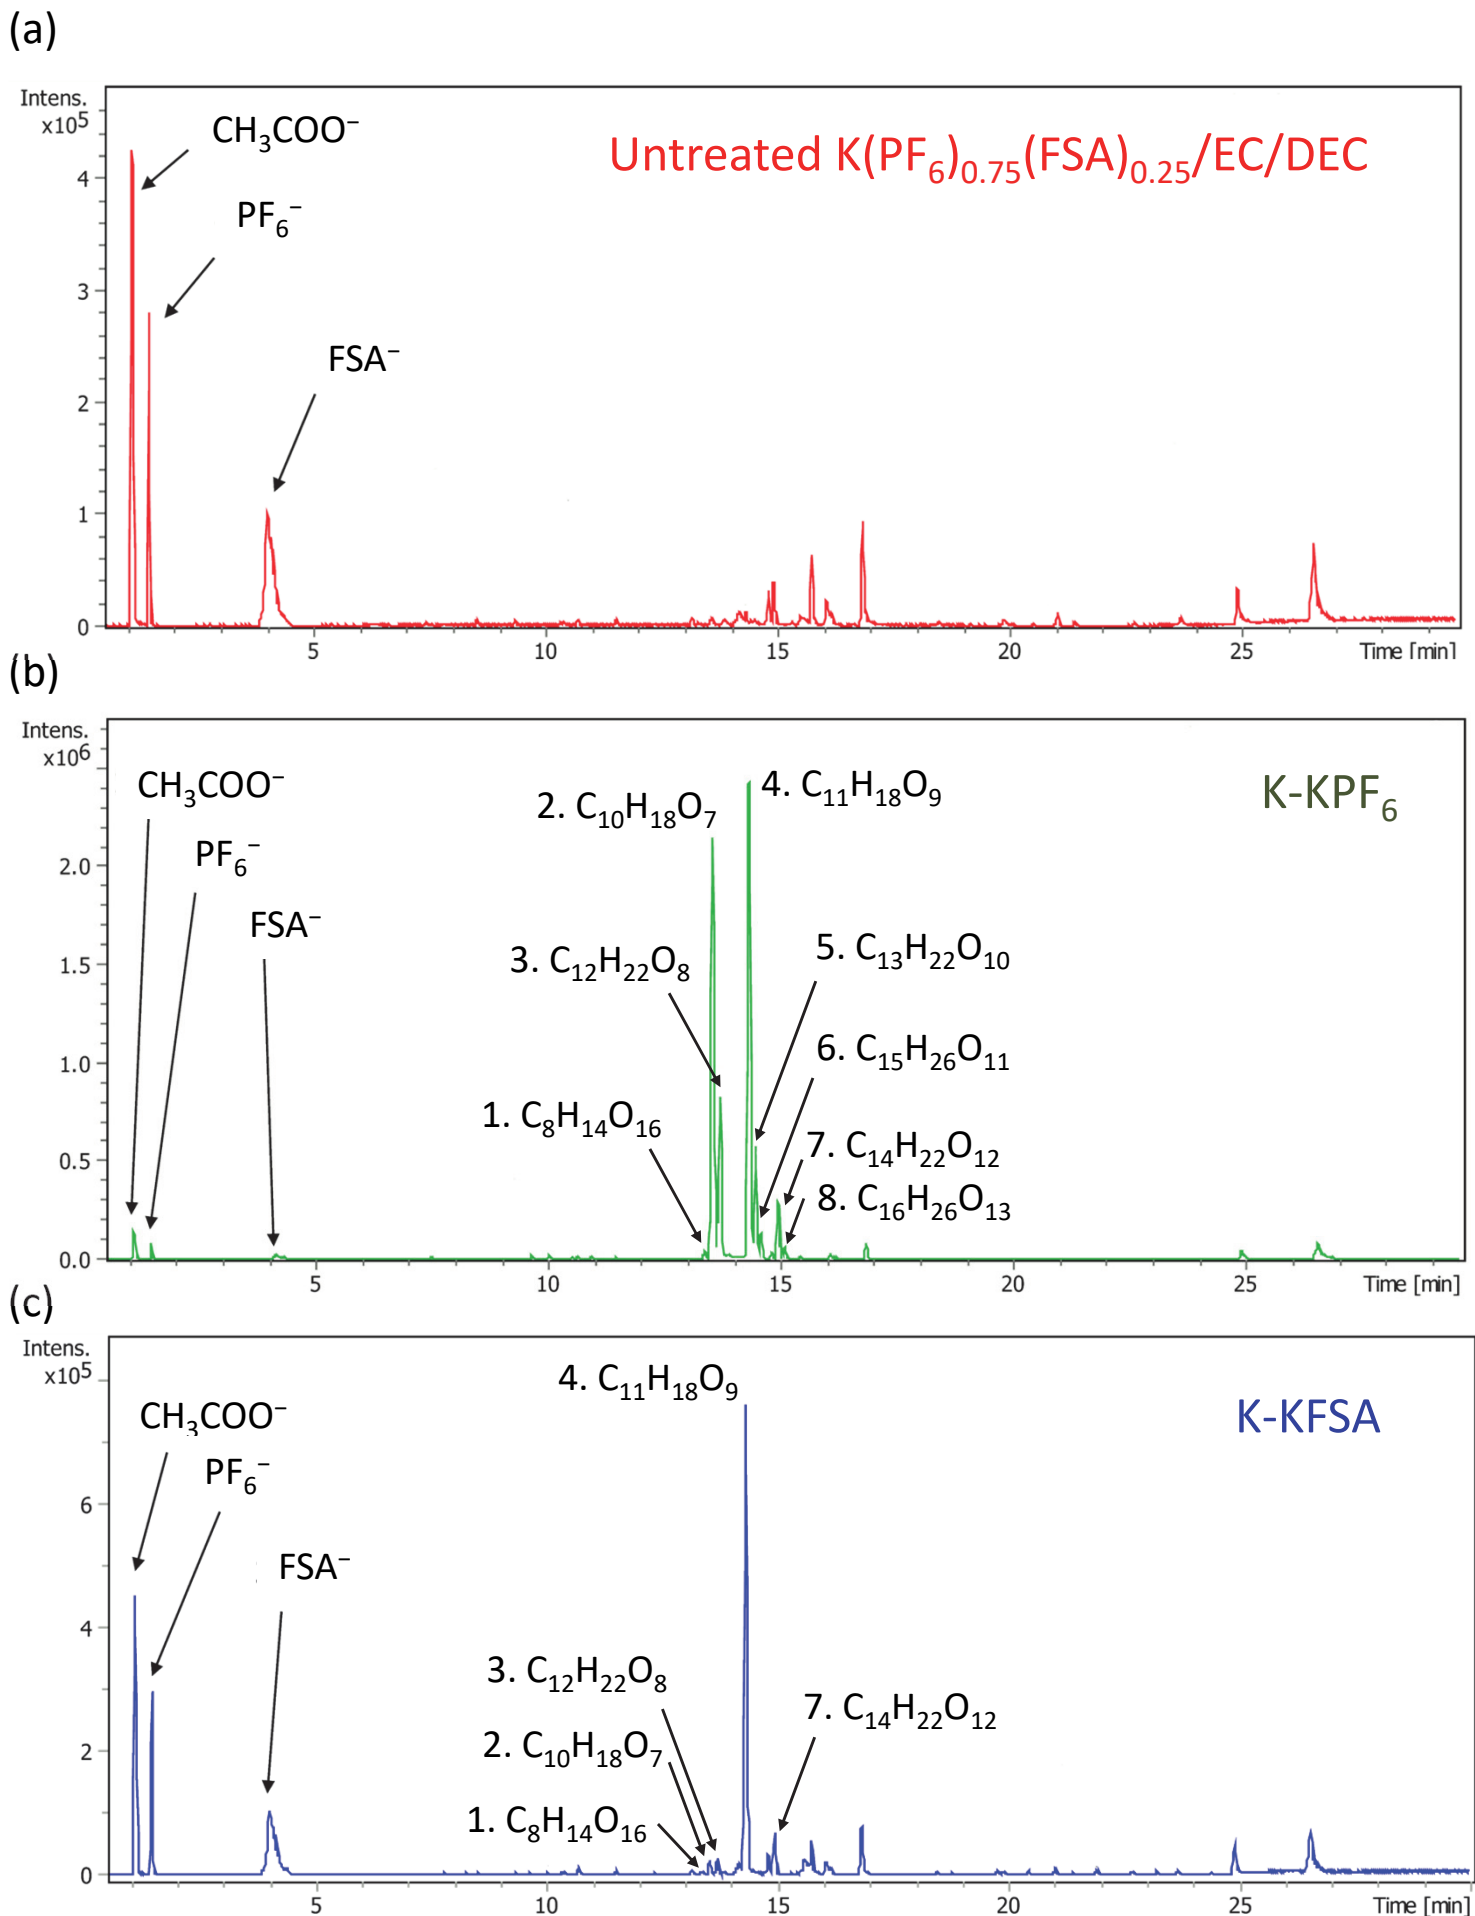

**Figure S9.** LC-MS analysis of the electrolytes by positive mode: total ion current chromatogram of (a) untreated  $K(PF_6)_{0.75}(FSA)_{0.25}/EC/DEC$ , (b) K-KPF<sub>6</sub>, and (c) K-KFSA.

**Table S1** Decomposition products in K-KFSA and K-KPF<sub>6</sub> solutions detected by LCMS (positive mode) analysis.

| Number       | K-KFSA electrolyte | K-KPF <sub>6</sub> electrolyte | Estimated formula                               | Estimated chemical structure                                                         |
|--------------|--------------------|--------------------------------|-------------------------------------------------|--------------------------------------------------------------------------------------|
| LCMS Pos. #1 | ✓                  | ✓                              | C <sub>8</sub> H <sub>14</sub> O <sub>6</sub>   | 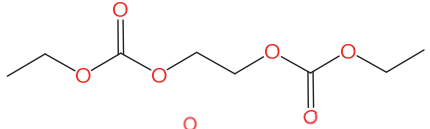  |
| LCMS Pos. #2 | ✓                  | ✓                              | C <sub>10</sub> H <sub>18</sub> O <sub>7</sub>  |   |
| LCMS Pos. #3 | ✓                  | ✓                              | C <sub>12</sub> H <sub>22</sub> O <sub>8</sub>  |    |
| LCMS Pos. #4 | ✓                  | ✓                              | C <sub>11</sub> H <sub>18</sub> O <sub>9</sub>  |   |
| LCMS Pos. #5 |                    | ✓                              | C <sub>13</sub> H <sub>22</sub> O <sub>10</sub> |    |
| LCMS Pos. #6 |                    | ✓                              | C <sub>15</sub> H <sub>26</sub> O <sub>11</sub> |   |
| LCMS Pos. #7 | ✓                  | ✓                              | C <sub>14</sub> H <sub>22</sub> O <sub>12</sub> |  |
| LCMS Pos. #8 |                    | ✓                              | C <sub>16</sub> H <sub>26</sub> O <sub>13</sub> |  |

## Positive #1 Retention time = 13.4 min

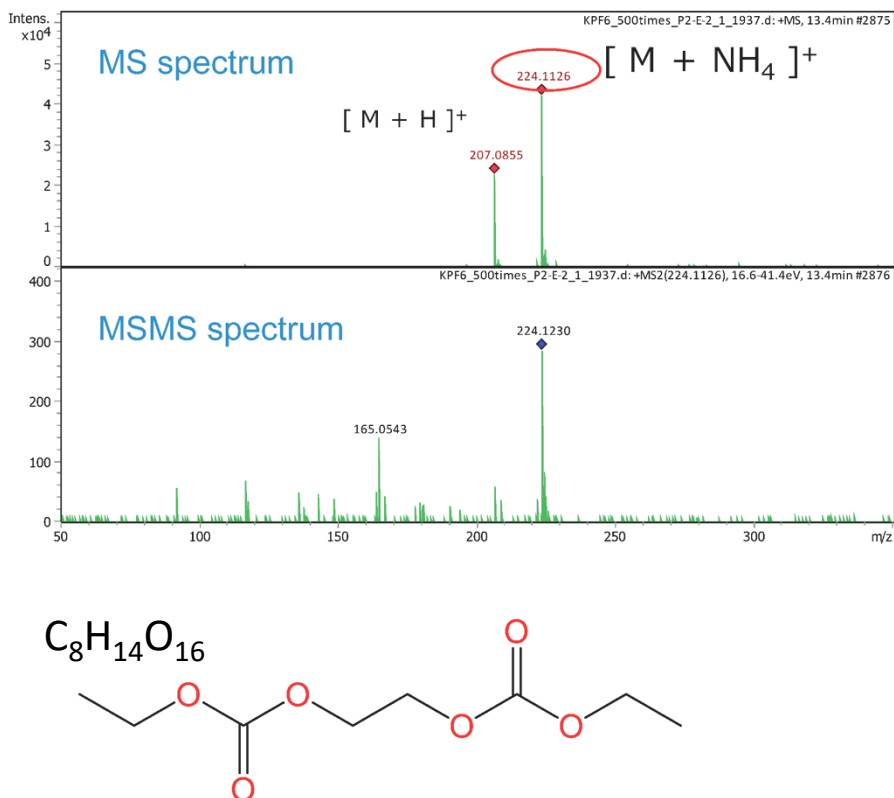

**Figure S10.** LC-MS and MSMS spectra of peak #1 in positive mode and estimated structure.

## Positive #2 Retention time = 13.6 min

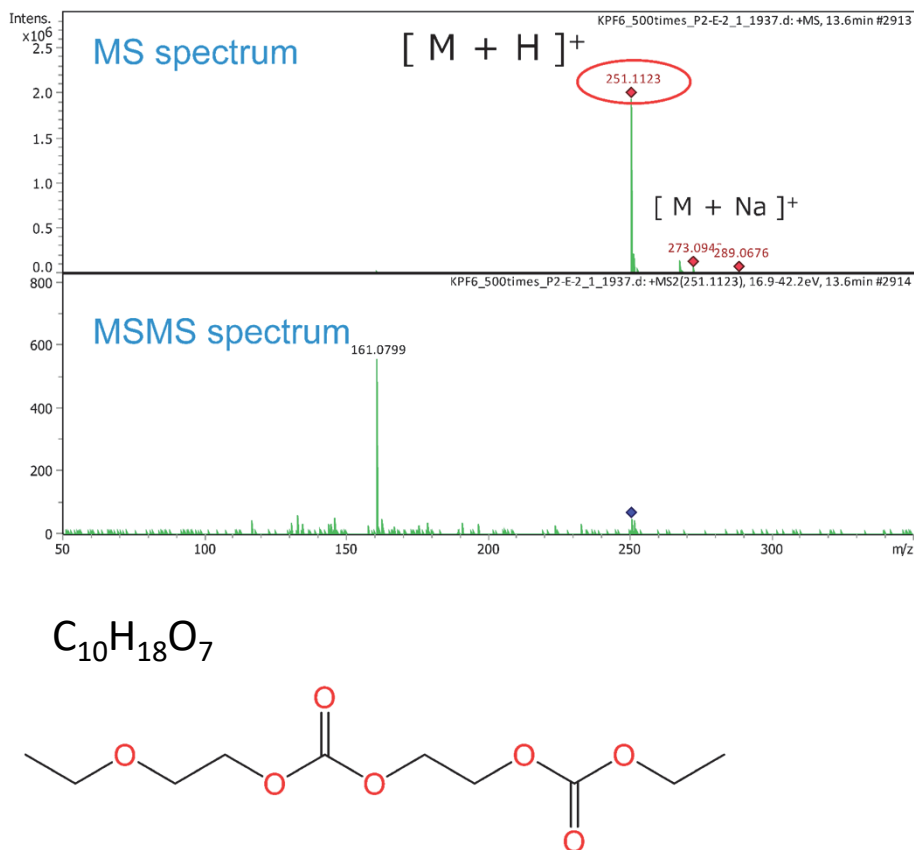

**Figure S11.** LC-MS and MSMS spectra of peak #2 in positive mode and estimated structure.

## Positive #3 Retention time = 13.7 min

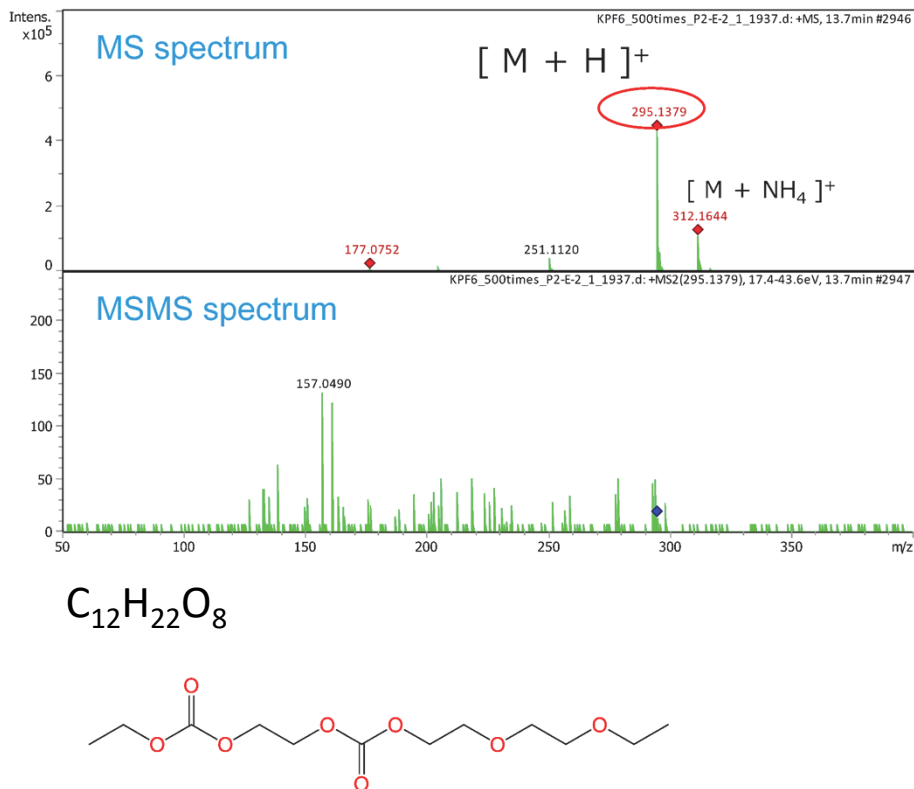

**Figure S12.** LC-MS and MSMS spectra of peak #3 in positive mode and estimated structure.

## Positive #4 Retention time = 14.3 min

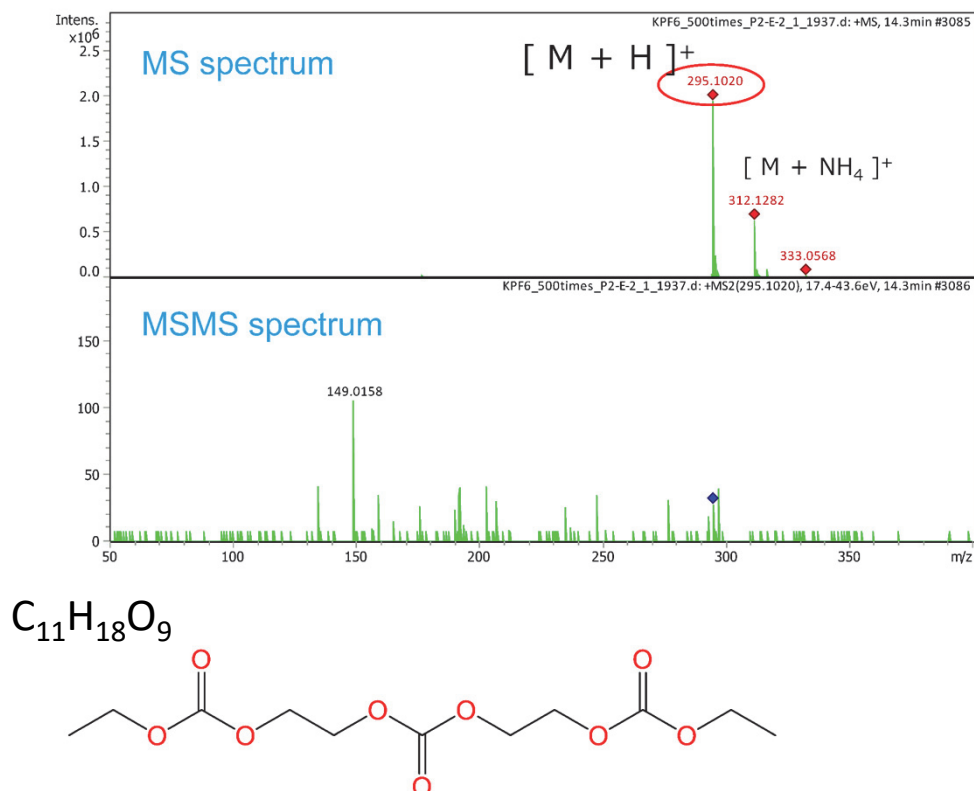

**Figure S13.** LC-MS and MSMS spectra of peak #4 in positive mode and estimated structure.

## Positive #5 Retention time = 14.5 min

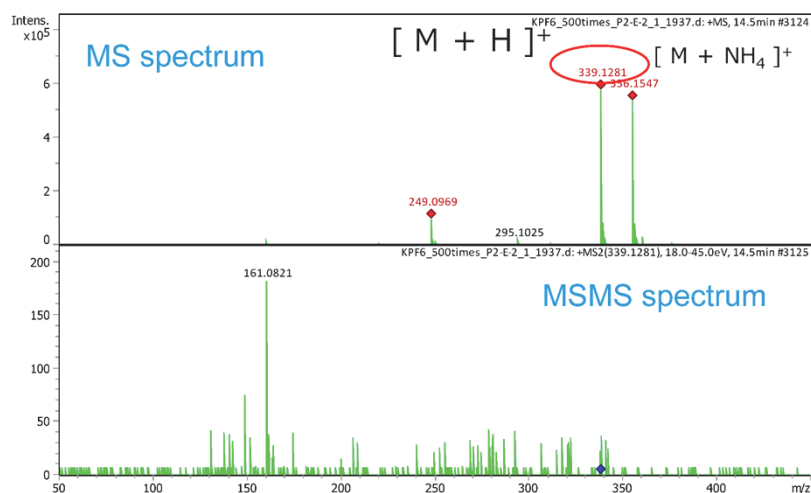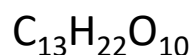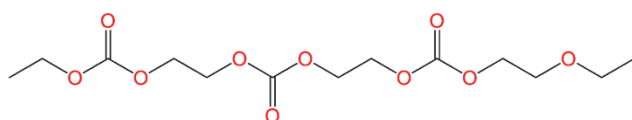

**Figure S14.** LC-MS and MSMS spectra of peak #5 in positive mode and estimated structure.

## Positive #6 Retention time = 14.6 min

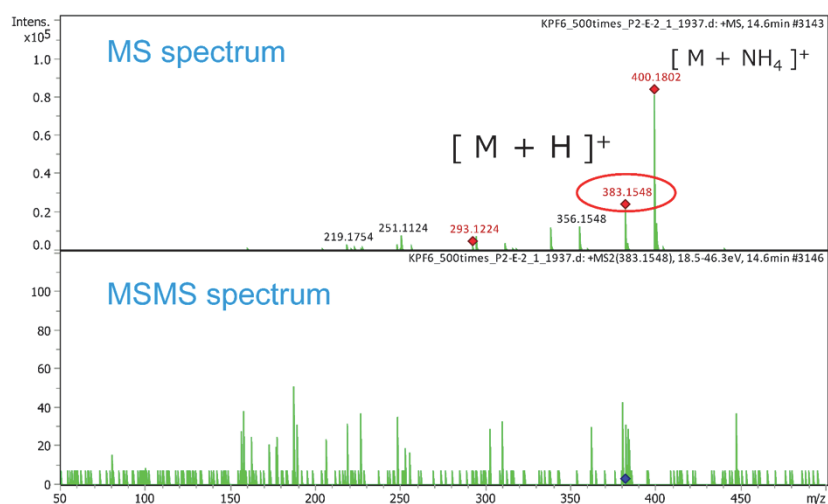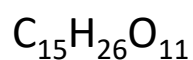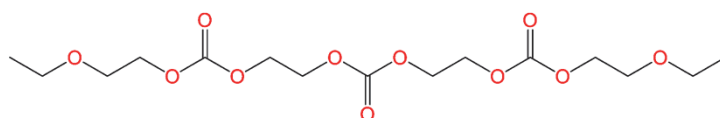

**Figure S15.** LC-MS and MSMS spectra of peak #6 in positive mode and estimated structure.

## Positive #7 Retention time = 14.9 min

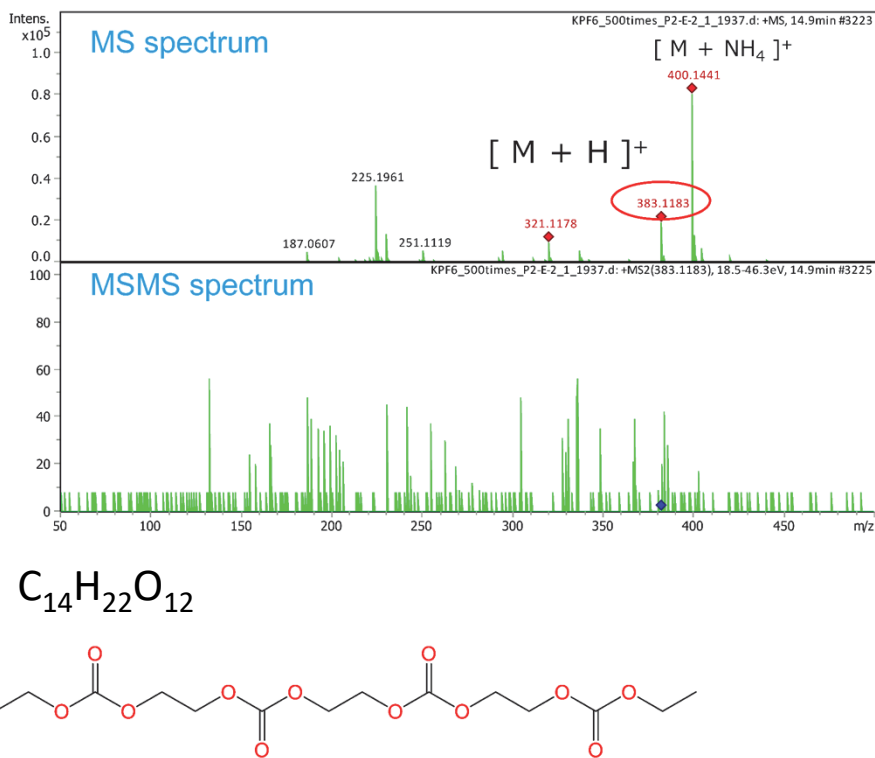

**Figure S16.** LC-MS and MSMS spectra of peak #7 in positive mode and estimated structure.

## Positive #8 Retention time = 15.1 min

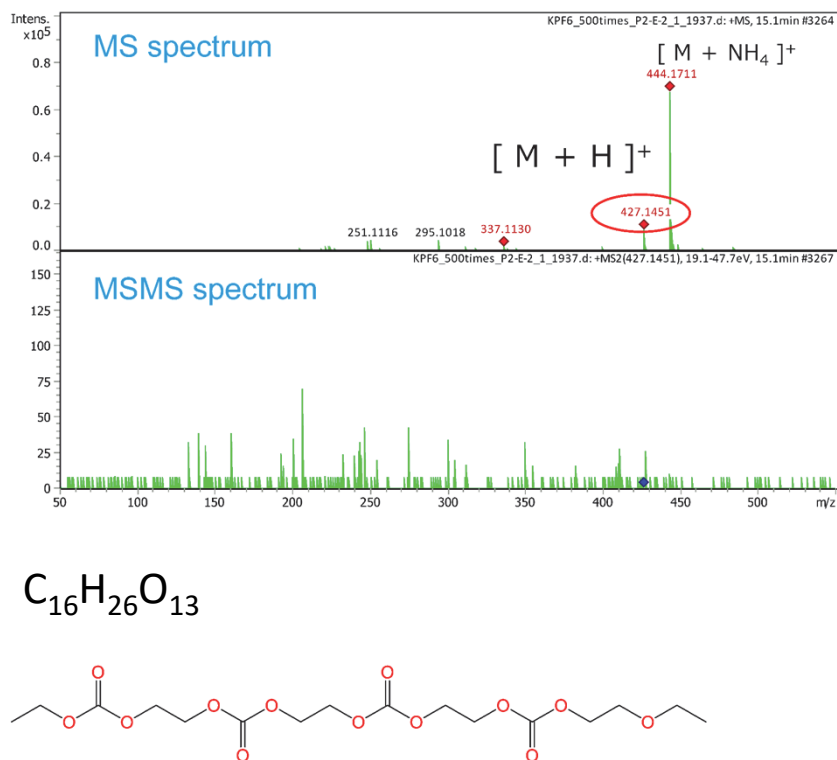

**Figure S17.** LC-MS and MSMS spectra of peak #8 in positive mode and estimated structure.

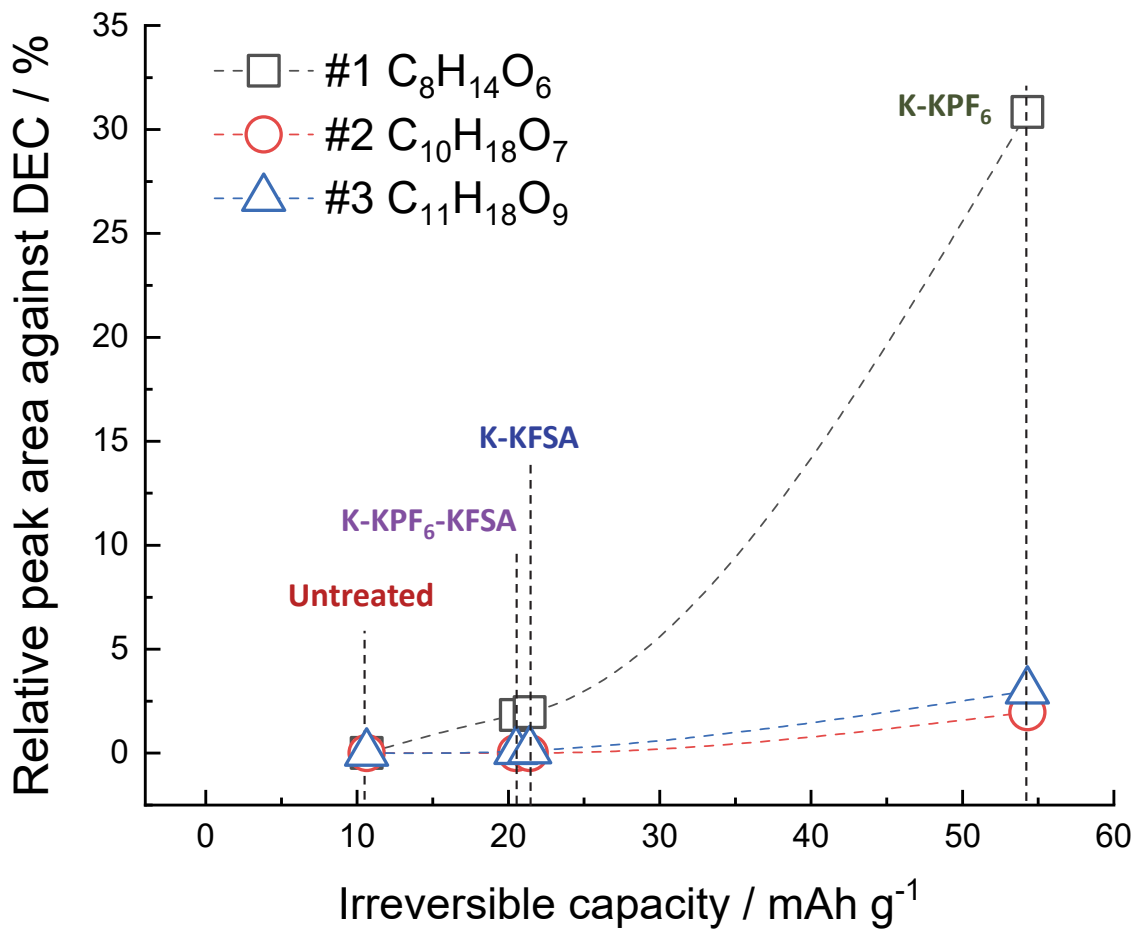

**Figure S18.** Correlation between the irreversible capacity of the  $\text{K}_2\text{Mn}[\text{Fe}(\text{CN})_6]$  electrodes and relative peak area of each oligocarboxylate against DEC in the TIC of GC-MS analysis.



# Negative #1 Retention time = 10.8 min

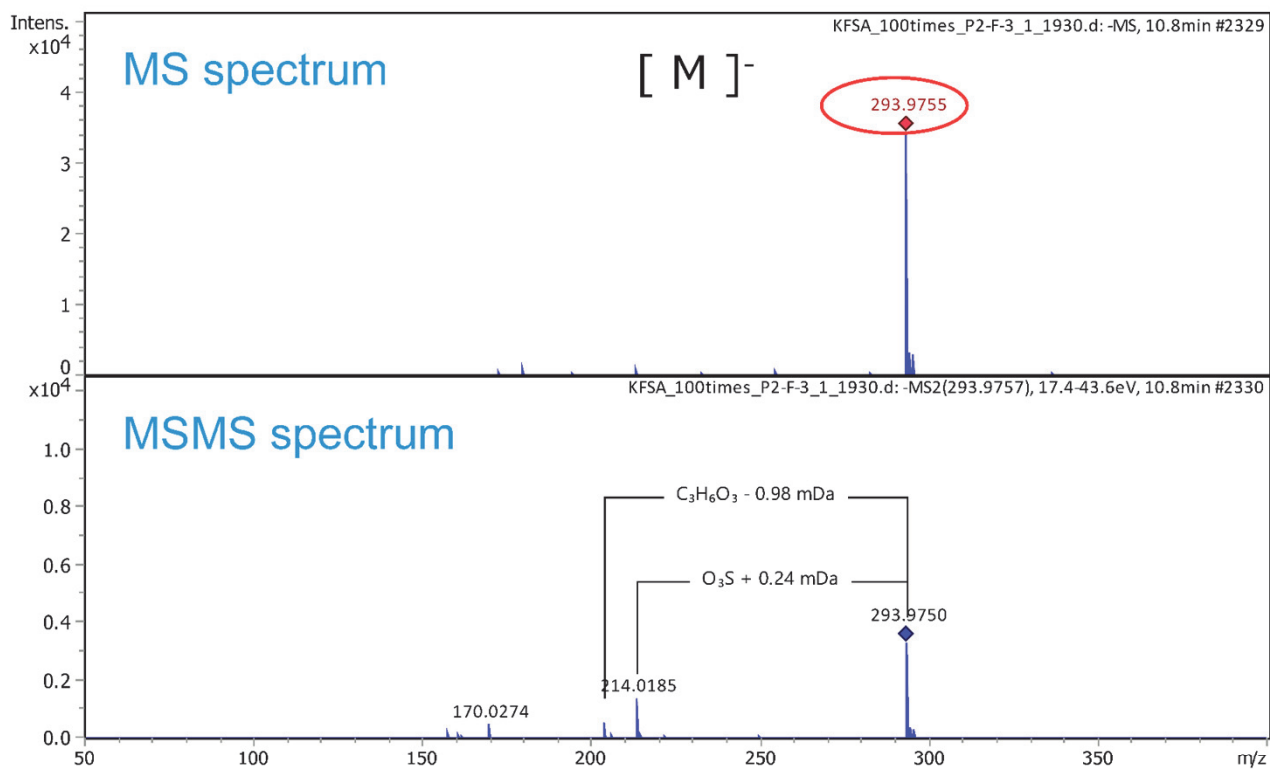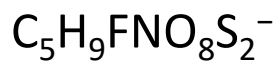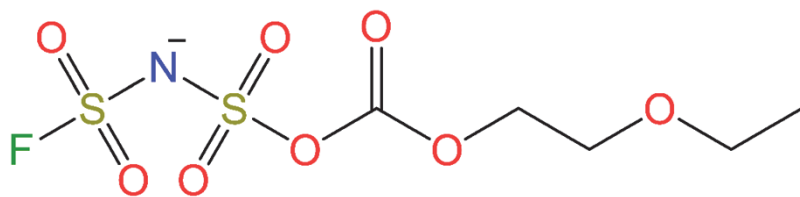

**Figure S19.** LC-MS and MSMS spectra of peak #1 in negative mode (**Figure 4**) and estimated structure.

# Negative #2 Retention time = 11.4 min

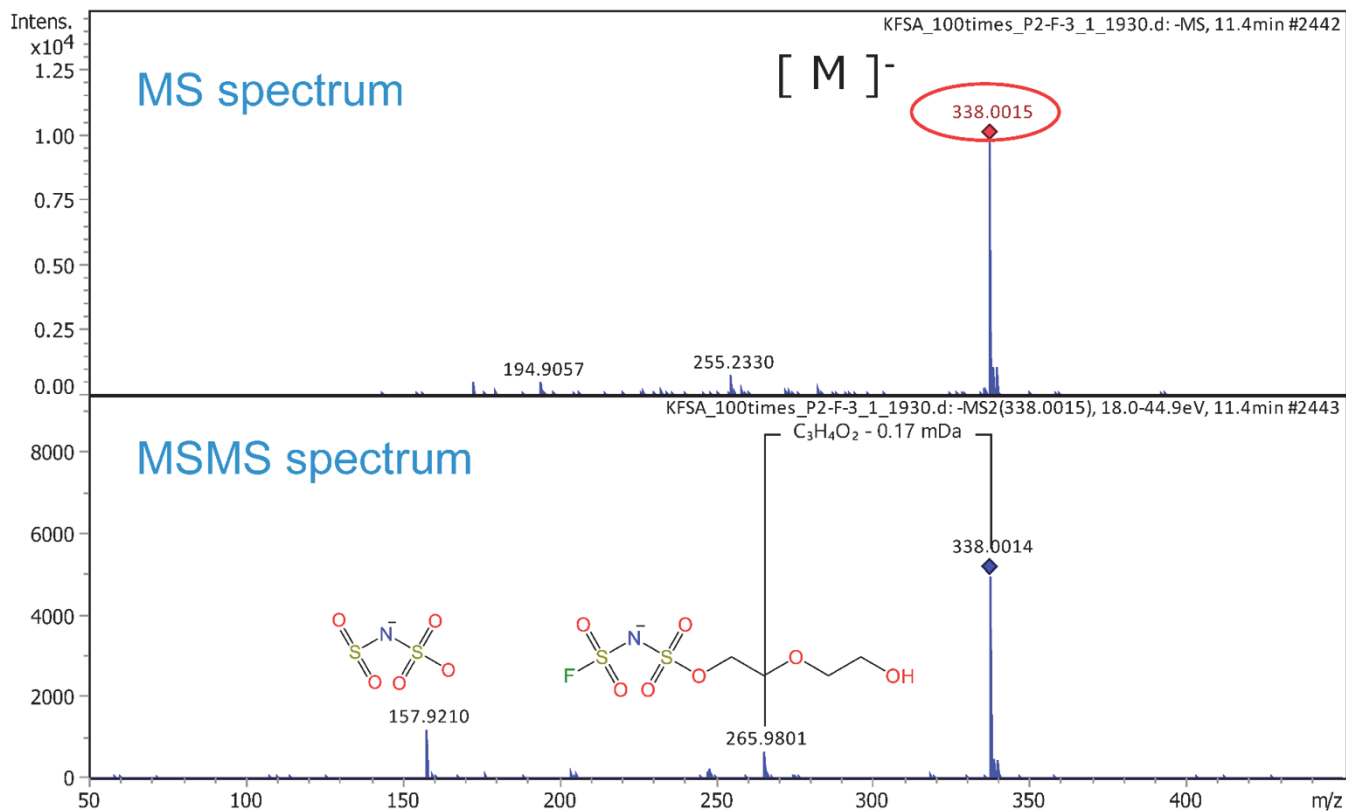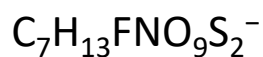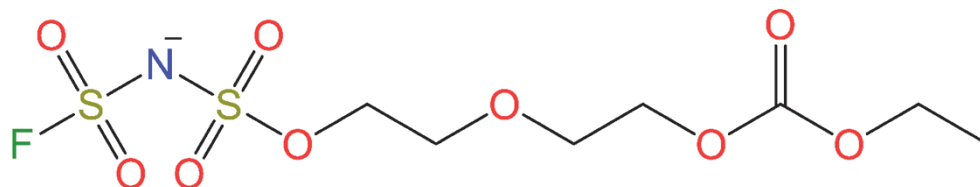

**Figure S20.** LC-MS and MSMS spectra of peak #2 in negative mode (Figure 4) and estimated structure.

# Negative #3 Retention time = 13.4 min

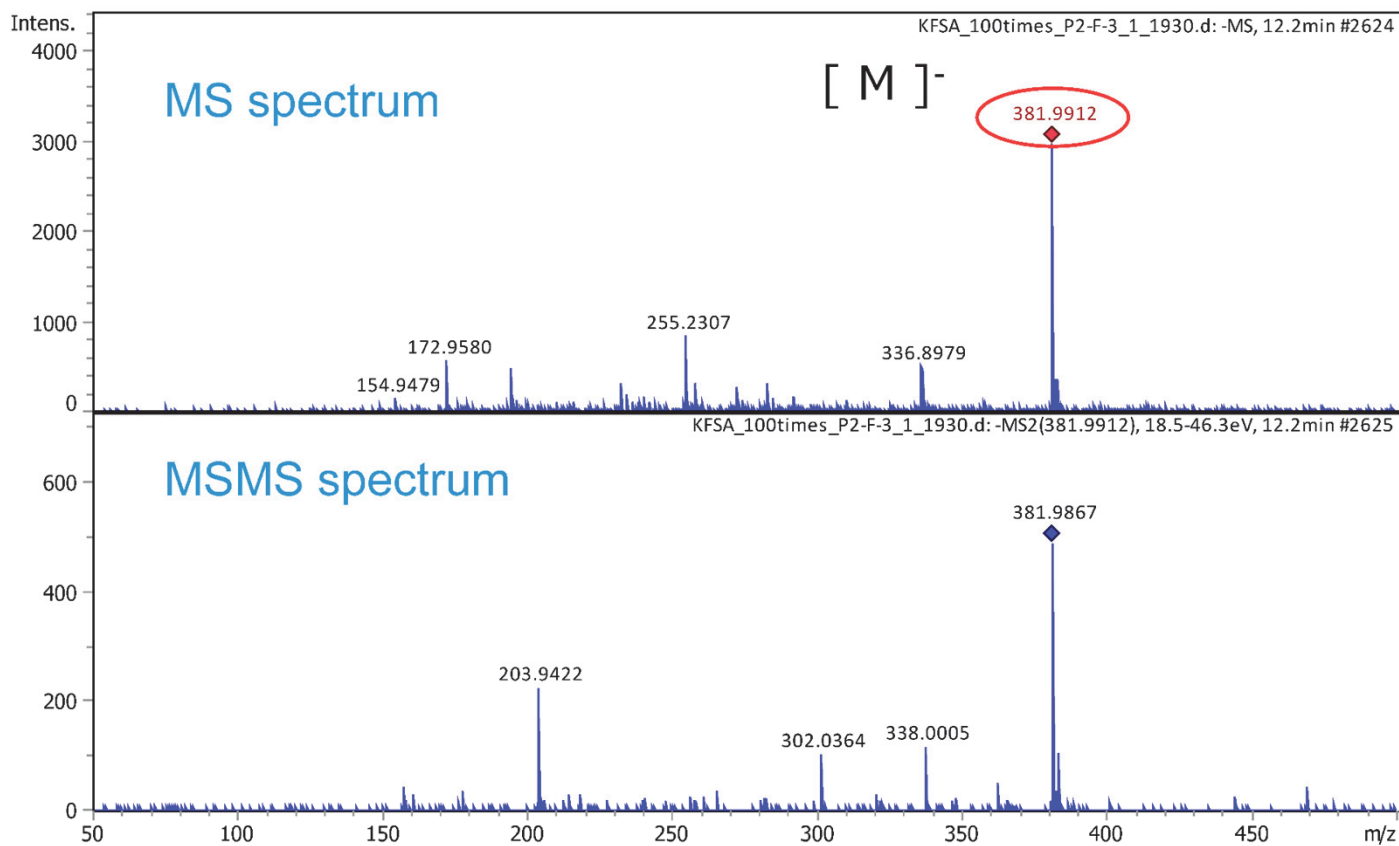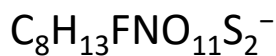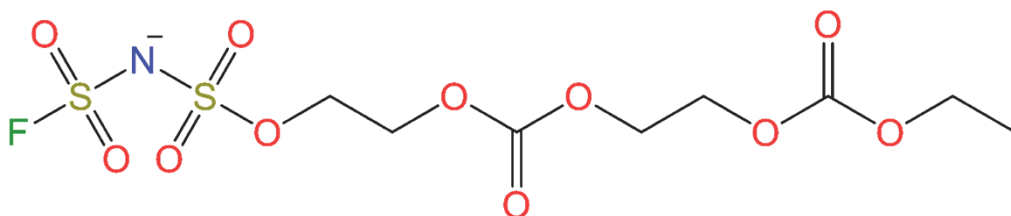

**Figure S21.** LC-MS and MSMS spectra of peak #3 in negative mode (Figure 4) and estimated structure.

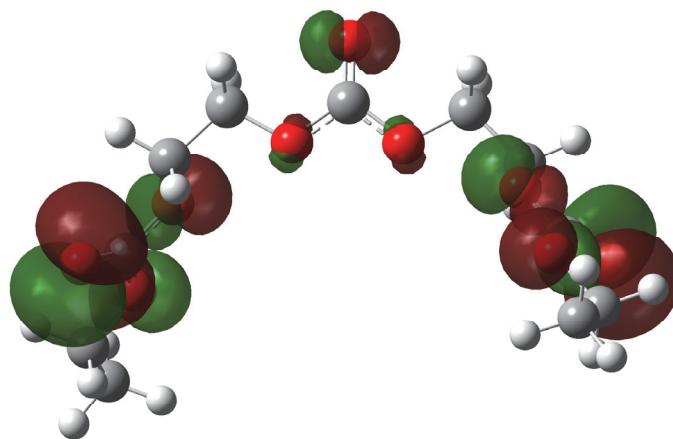

**Figure S22.** Optimized structure and HOMO of  $C_{11}H_{18}O_9$  obtained by DFT calculations using an IEFPCM (acetonitrile) solvation model.

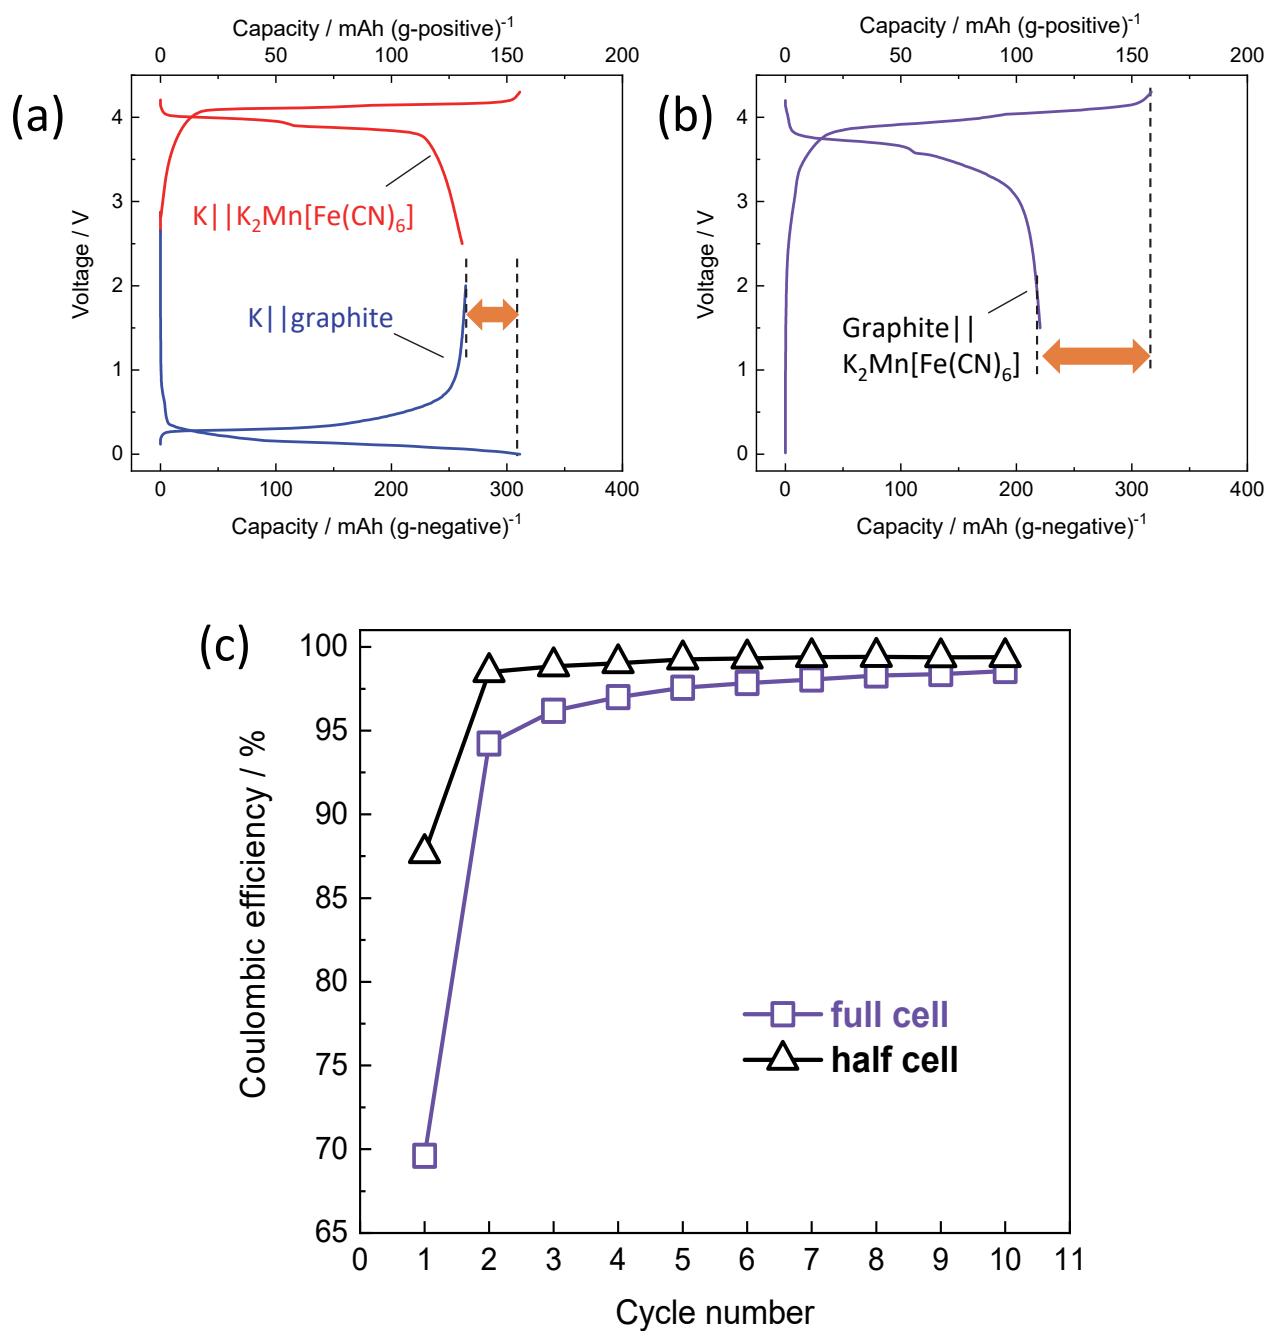

**Figure S23** Charge/discharge curves of (a) half cells: AC ||  $K_2Mn[Fe(CN)_6]$  in the three-electrode cells and  $K || \text{graphite}$  in coin cells and (b) a  $\text{graphite} || K_2Mn[Fe(CN)_6]$  full cell. (c) Coulombic efficiency of the electrodes : full cell of  $\text{graphite} || K_2Mn[Fe(CN)_6]$  (purple) and K metal cell of  $K || \text{graphite}$  (black).

(a)

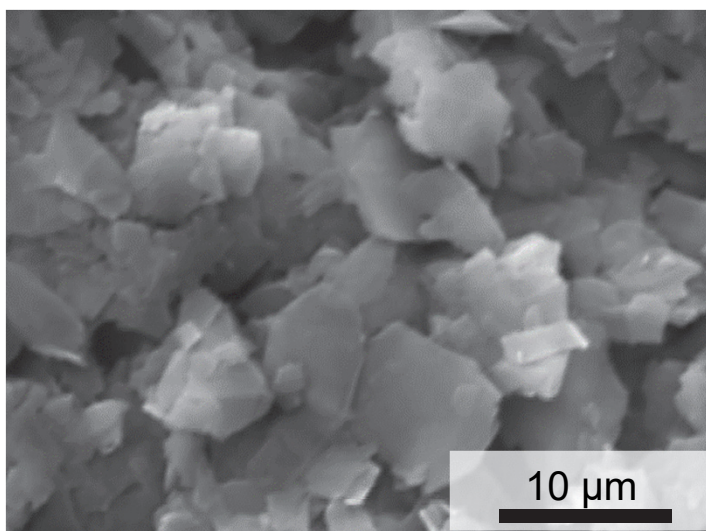

(b)

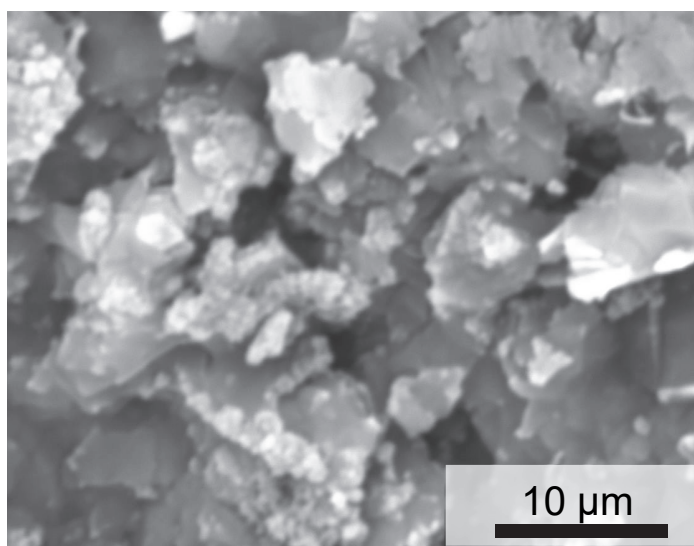

(c)

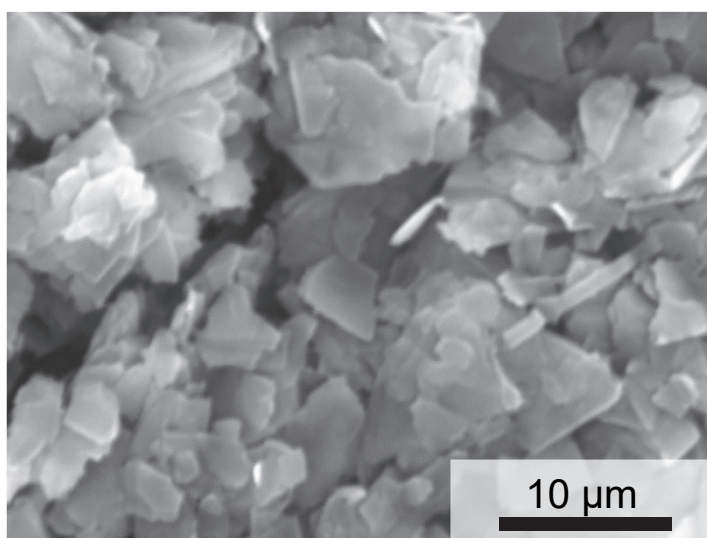

**Figure S24.** SEM images of graphite electrodes: (a) pristine, (b) tested in full cell and (c) tested in K metal cell for 10 cycles.

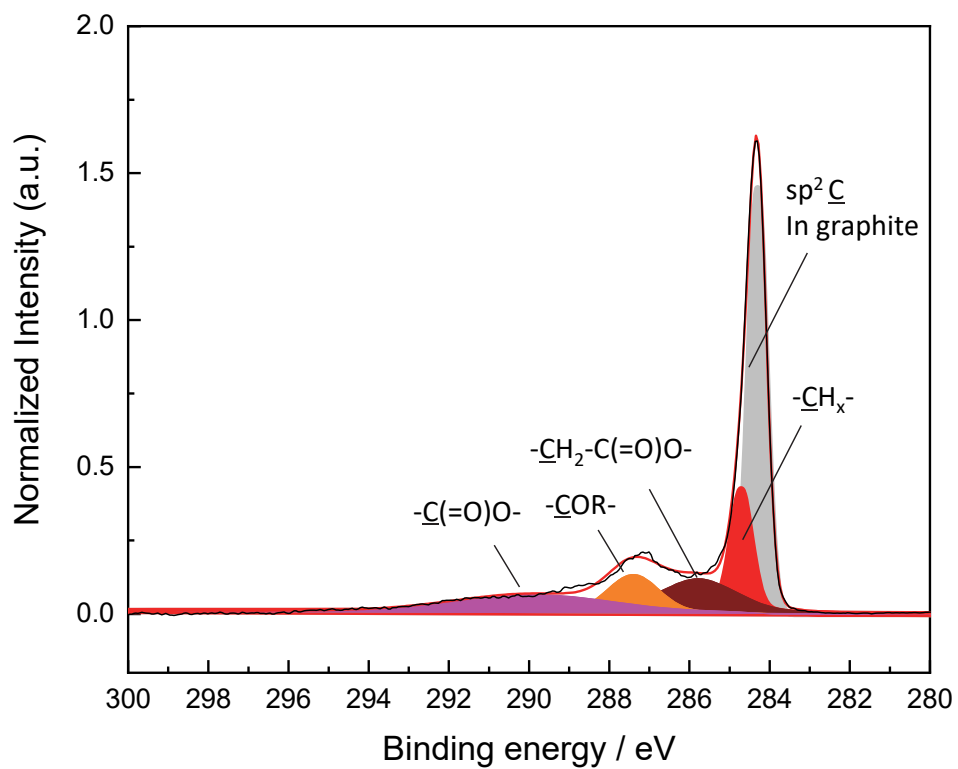

**Figure S25** HAXPES spectra of the pristine graphite electrode: C 1s spectrum.

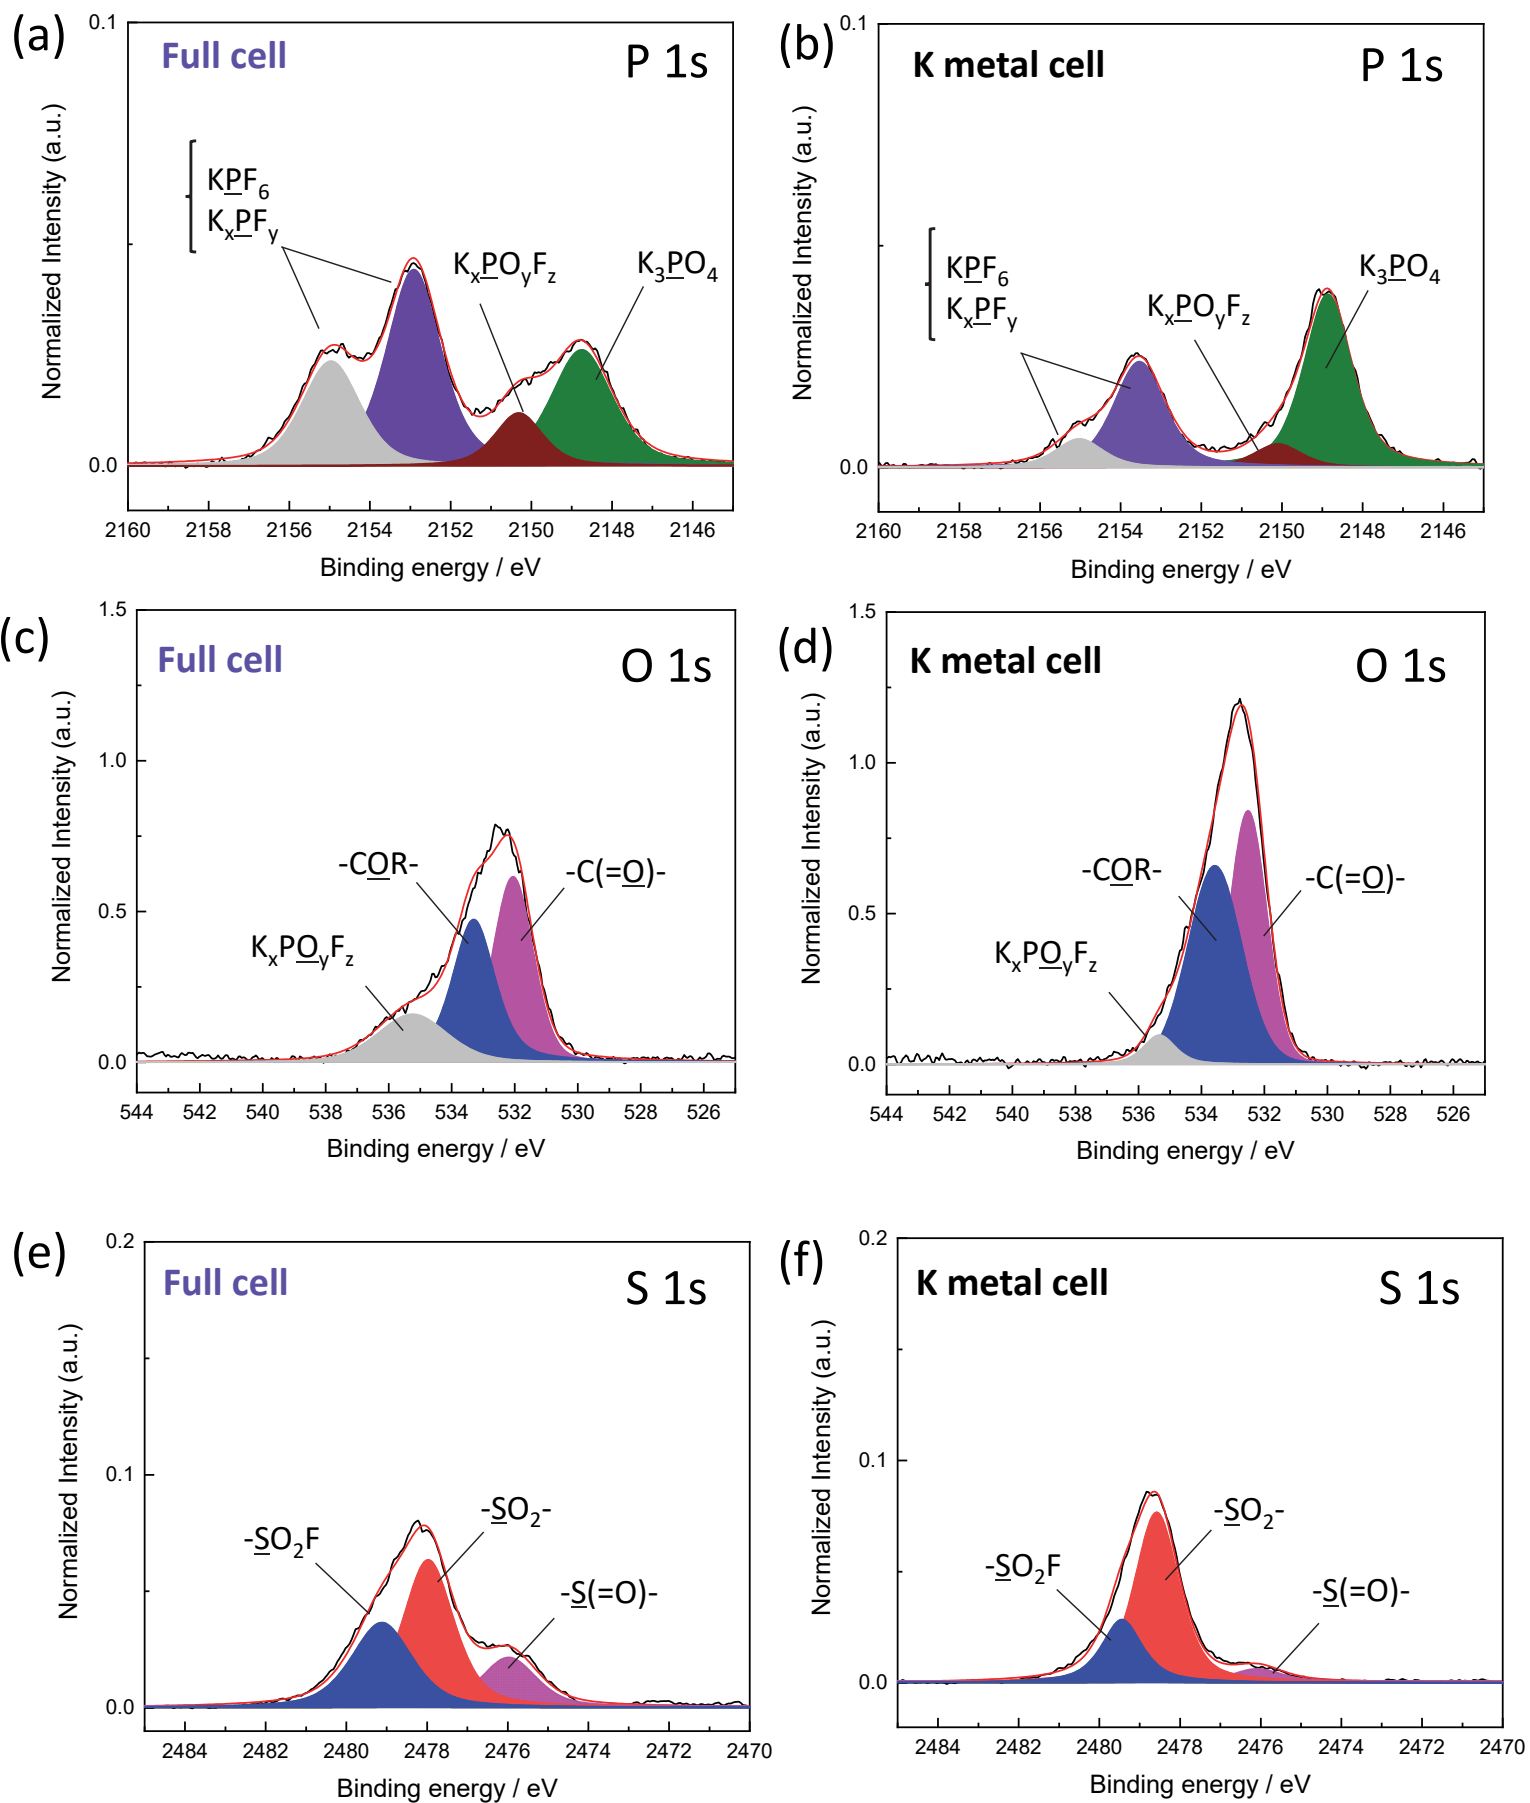

**Figure S26** HAXPES spectra of the graphite electrode after 10 cycles: P 1s in (a) full and (b) half-cells, O 1s in (c) full and (d) half cells, F 1s in (e) full and (f) half-cells.



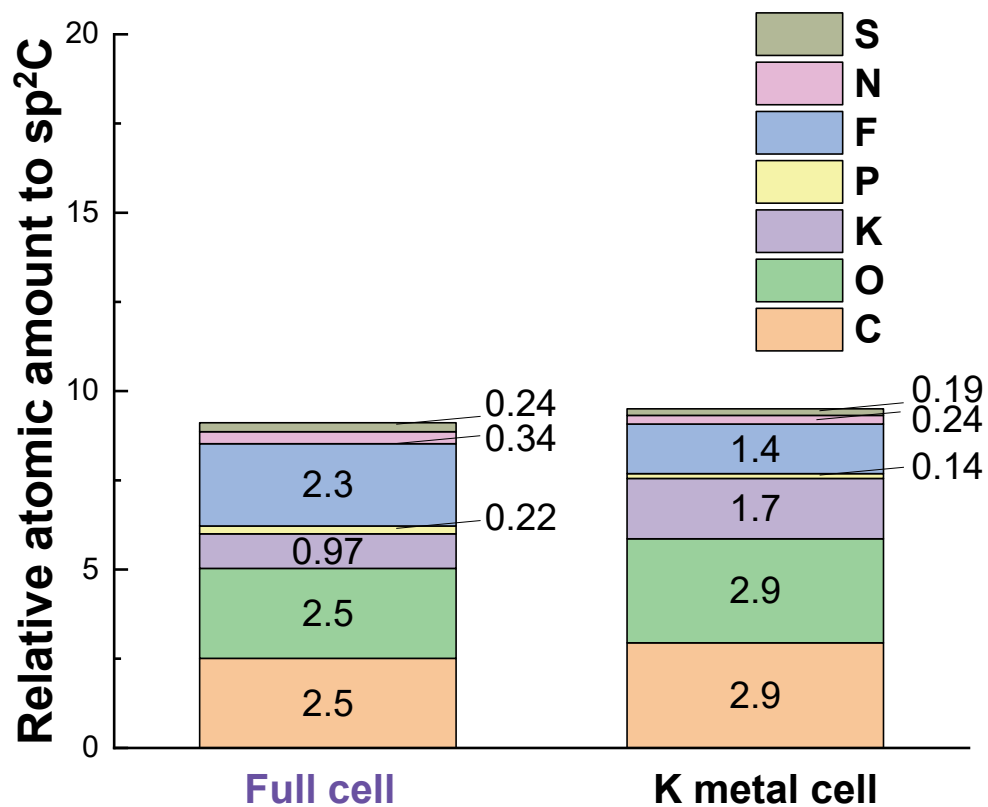

**Figure S27** Atomic fractions relative to  $sp^2$  carbon calculated from the HAXPES data using relative sensitivity factors.
